# Supplementary material
Source: PubMed Central journal article supplement (PMC6150726)
Supplement: pr8b00313_si_001.pdf [file pr8b00313_si_001.pdf]

# Certificate of Analysis

02.03.2015

Order number: 100151  
**Protein:** QconCAT QcStelder01 Expression in E.coli

|                         |                                                                                                                             |
|-------------------------|-----------------------------------------------------------------------------------------------------------------------------|
| Label :                 | <sup>15</sup> N                                                                                                             |
| Purification :          | Ni-NTA                                                                                                                      |
| Buffer :                | 0.5% HAc                                                                                                                    |
| Storage :               | -80°C                                                                                                                       |
| Quality Control :       | Purity validation by SDS-PAGE<br>Protein concentration determined by Aminoacid analysis<br>Peptide fingerprint by Maldi-TOF |
| Protein concentration : | 0.493 mg/ml                                                                                                                 |
| Aliquots:               | 8 x 500 µl                                                                                                                  |
| Quantity of protein :   | 1,972 mg                                                                                                                    |

## Sequence:

MAGRQSEPVEYETTLADLQKFLWNWDKGTPTIQNAVLLERVDINVYRANVQLVGTSTLLTRATVDSLPIRDLIGS  
 FVREEIILIAIKVGGELVSLGKSVSQVVKVNYTDEVSIQYREFVTEVVGETKNASVSEAAAQESKVAQELFQKTSY  
 NDTHQYRVSTVVYGNDAIAVKPRIPTPSIPITKISVQSTLNEITIPATGNTNIRAADYGADAASGGHDNKFEV  
 VGQADDNSAGAVRIAVGFNYAAFKDIVTENVYFLERIHIVQKQAGAGSAPPKGASGEDVIELQSRFGLPVDGLA  
 GAKAVNTAASFLAKEGDPLEIFVDRFITNILQTAQKISQTYNVPLASLAKGDGISYNTYRANAYGHDYVPAKL  
 SPLQLQELKLNFEFDLKIALDDGSIVGFSKSSLPALADVWRAADGSVILTVSKI IELAPQAVDKTFVSLPVR  
 NTFPTQNELVEISRQATVVMYERGSLSGTQSYTGI IEAAGREGVNDNEEGFFSARLAAALEHHHHHHH

**Electrophoresis:** (SDS PAGE, 12.5%, Coomassie stain)

Abbr.

CLS cell lysate supernatant  
 RP remaining pellet after solubilisation of inclusion bodies  
 L load  
 F flowthrough  
 W wash  
 E eluate

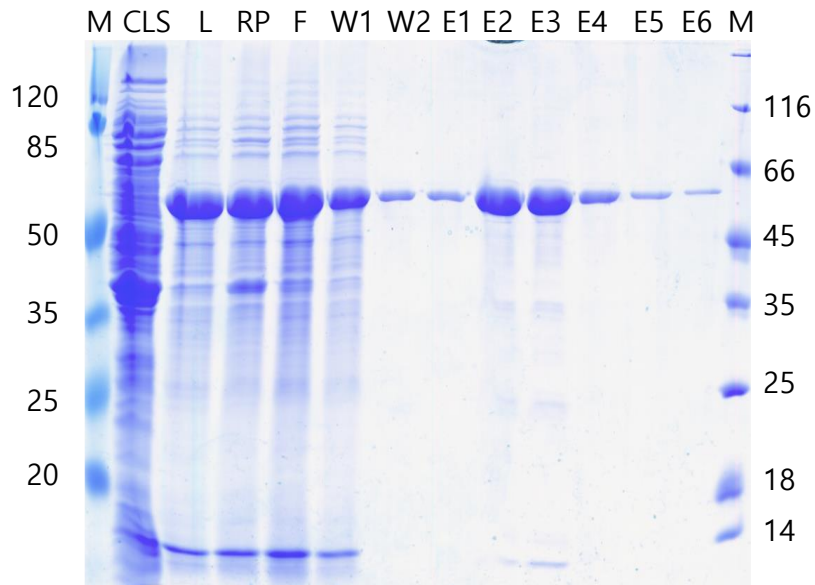

Due to the high protein content, the flow-through fraction was re-purified by diluting with binding buffer w/o imidazole and re-applying to the Ni-sepharose.

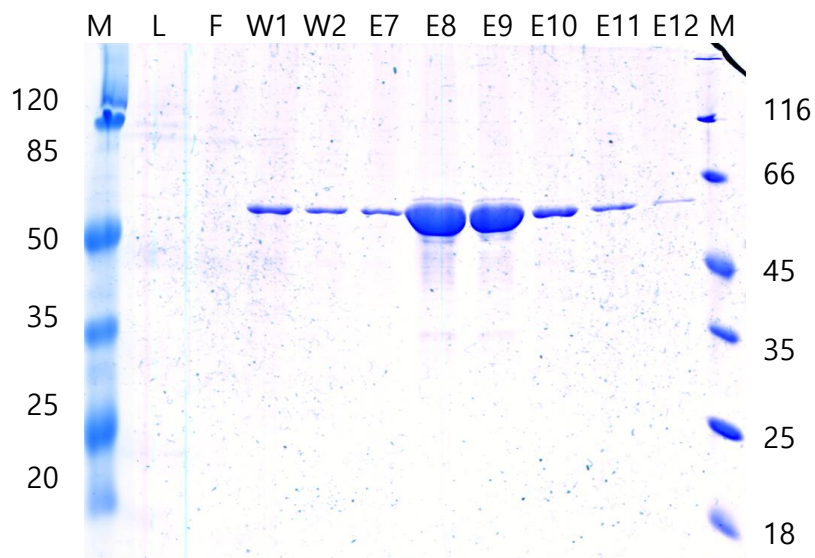

Fractions 2, 3, 8 & 9 were pooled and dialysed against 0.5% HAc.
